# 1 Assessments of hepatitis B virus-like particles and Crm197 as 2 carrier proteins in melioidosis glycoconjugate vaccines

3  
4 Marc Bayliss<sup>a,%</sup>, Matthew I. Donaldson<sup>b,%</sup>, Giulia Pergolizzi<sup>b,c,%</sup>, Andrew E. Scott<sup>a</sup>, Sergey A. Nepogodiev<sup>b</sup>,  
5 Lucy Beales<sup>d</sup>, Michael Whelan<sup>e</sup>, William Rosenberg<sup>e,f</sup>, Hadrien Peyret<sup>b</sup>, George P. Lomonosoff<sup>b</sup>, Nicholas  
6 J. Harmer<sup>g</sup>, Tim Atkins<sup>a,h</sup>, Robert A. Field<sup>b,c,i,\*</sup>, Joann L. Prior<sup>a,h,j,\*</sup>

7  
8 <sup>a</sup> Chemical, Biological and Radiological Division, Defence Science and Technology Laboratory, Porton  
9 Down, Salisbury, Wiltshire, SP4 0JQ, UK

10 <sup>b</sup> Department of Biological Chemistry, John Innes Centre, Norwich Research Park, Norwich, NR4 7UH, UK

11 <sup>c</sup> Icen Diagnostics Ltd, Norwich Research Park Innovation Centre, Colney Lane, Norwich NR4 7GJ, UK

12 <sup>d</sup> Mologic Ltd, Bedford Technology Park, Thurleigh, Bedford, MK44 2YP, UK

13 <sup>e</sup> iQur Ltd, 2 Royal College St, Kings Cross, London NW1 0NH

14 <sup>f</sup> Institute for Liver and Digestive Health, UCL Division of Medicine, Royal Free Campus, London NW3  
15 2PF, UK

16 <sup>g</sup> Living Systems Institute, University of Exeter, Stocker Road, Exeter, EX4 4QD, UK

17 <sup>h</sup> College of Life and Environmental Sciences, University of Exeter, Exeter, EX4 4QD, UK

18 <sup>i</sup> Present address: Manchester Institute of Biotechnology, The University of Manchester, 131 Princess  
19 Street, Manchester, M1 7DN, UK

20 <sup>j</sup> London School of Hygiene and Tropical Medicine, Keppler Street, London, WC1 7HT, UK

21  
22 <sup>%</sup> These authors contributed equally to this study

23  
24 \* Corresponding email addresses: [jprior@dstl.gov.uk](mailto:jprior@dstl.gov.uk); [robert.field@manchester.ac.uk](mailto:robert.field@manchester.ac.uk)

## 25 26 Abstract

27  
28 The Tier 1 select agent *Burkholderia pseudomallei* is the causative agent of melioidosis, a global pathogen  
29 and a major cause of pneumonia and sepsis for which no licensed vaccines currently exist. Previous work  
30 has shown the potential for *Burkholderia* capsular polysaccharide (CPS) to be used as a vaccine antigen  
31 but the T-cell independent nature of the immune response to this molecule requires the use of this  
32 polysaccharide as a glycoconjugate for vaccination. Recent studies have focussed on the use of Crm197  
33 (a non-toxic mutant protein derived from diphtheria toxin) as the carrier but there are concerns regarding  
34 its potential to cause interference with other vaccines containing Crm197. Therefore research with  
35 alternative carrier proteins would be beneficial. In this study, CPS was isolated from the non-pathogenic *B.*  
36 *thailandensis* strain E555. This was chemically conjugated to Crm197, or Tandem Core™ virus-like  
37 particles (TCVLP) consisting of hepatitis B core protein, which is the first documented use of VLPs in  
38 melioidosis vaccine development. Analysis of CPS-specific IgG antibody titres showed that mice  
39 vaccinated with the Crm197 conjugate generated significantly higher titres than the mice that received

40 TCVLP-CPS but both conjugate vaccines were able to protect mice against intraperitoneal  
41 *B. pseudomallei* strain K96243 challenges of multiple median lethal doses.

42

43 **Keywords:** Melioidosis, *Burkholderia pseudomallei*, Virus-like particles, Crm197, carrier protein, vaccine  
44 platform, capsular polysaccharide, protein antigen, glycoconjugate vaccine, bacterial challenge, ELISA.

45

## 46 Introduction

47

48 *B. pseudomallei* is the causative agent of melioidosis, a potentially lethal human and animal disease  
49 disseminated through soil and water [1, 2, 3]. *B. pseudomallei* is classified as a Tier 1 bio-threat agent by  
50 the US Centers for Disease Control and Prevention (CDC) [4] and it is estimated that the annual number of  
51 deaths resulting from melioidosis (89,000) is comparable to that of measles [5]. For these reasons,  
52 development of a *B. pseudomallei* vaccine is a priority. *B. pseudomallei* capsular polysaccharide (CPS), -  
53 3-)-2-O-acetyl-6-deoxy- $\beta$ -D-manno-heptopyranose-(-1 polymer, is a protective antigen and virulence  
54 determinant [6, 7]. The immune response to polysaccharides, which are generally T cell-independent type  
55 2 antigens, can be significantly improved by conjugation to a carrier protein, which leads to the formation  
56 of carbohydrate-specific CD4+ T-cells which provide help to antibody producing B cells [8, 9]. It has been  
57 shown that mice vaccinated with conjugates utilising bovine serum albumin as a carrier for CPS or TetHc  
58 as a carrier for synthetically-synthesised CPS are significantly protected against non-inhalational  
59 *B. pseudomallei* challenge compared to controls, but sterilising immunity was not achieved in every animal  
60 [10, 11]. Recently, one of the most commonly used carrier proteins in licensed conjugate vaccines, Crm197  
61 [12, 13], has been shown to protect mice against an inhalational challenge of *B. pseudomallei* and achieve  
62 high levels of sterilising immunity when conjugated to CPS [14]. This result and the obvious cost and  
63 safety advantages of Crm197 justify its use in melioidosis vaccine research but alternative carrier proteins  
64 should be sought due to concerns that prior exposure to a carrier can reduce carbohydrate-specific  
65 immune responses in other same-carrier-based conjugate vaccines. [9, 15, 16, 17, 18].

66

67 Alternative potential carrier proteins include virus-like particles which are formed from viral structural  
68 proteins, typically capsid or envelopes, which have the property of self-assembly for the formation of  
69 structures that mimic intact virus particles [19]. VLPs are non-infectious, non-replicating, and their  
70 particulate nature leads to efficient uptake by dendritic cells [20]. Antigenic epitopes in a VLP construct are  
71 displayed in a highly repetitive manner. This leads to B-cell receptor cross-linking and CD4+ and CD8+ T-  
72 cell stimulation, inducing both humoral and cellular immune responses [19, 21, 22], which are likely to be  
73 required for immunity to melioidosis [23]. Currently, recombinant VLP-based vaccines against Hepatitis B  
74 Virus (HBV), Human Papilloma Virus (HPV) and Hepatitis E Virus (HEV) have been approved and licensed

75 for human use; numerous other VLPs designed to generate protection against other viral diseases are  
76 under study and/or clinical trial [24].

77

78 Hepatitis B core antigen (HBcAg) is an effective activator of macrophages, can act as both a T-cell  
79 dependent and T-cell independent antigen [25, 26] and readily assembles into VLPs that have been  
80 explored for therapeutic use [27]. Furthermore, they are attractive carrier proteins as foreign constructs  
81 can be inserted into the HBcAg protein, which result in strong immune responses to both VLP and insert  
82 [28, 29]. In order to facilitate the conjugation of CPS to the major immunodominant region (MIR) of the VLP  
83 surface, Tandem Core™ technology was introduced [30] (generating TCVLPs) (Figure S1). A Tandem  
84 Core™ is two HBcAg sequences genetically linked, which allows for insertion of a wider range of  
85 constructs whilst remaining assembly competent (Figure S2). In the current study, we have genetically  
86 inserted six lysine residues flanked on either side by three aspartic acid residues into MIRs of TCVLPs,  
87 which can be used for chemical conjugation to polysaccharide antigens, such as *Burkholderia* CPS (Figure  
88 S3).

89

90 Further, CPS conjugates of TCVLP and Crm197 were prepared and evaluated for immunogenicity and  
91 protective efficacy in a murine model of melioidosis. We show that both TCVLPs and Crm197 can be used  
92 as effective carrier proteins in CPS glycoconjugate vaccines for melioidosis despite the significant  
93 difference in CPS antibody titres generated between them.

94

## 95 **Materials and methods**

### 96 *Bacteria/CPS isolation*

97 The O-PS deficient mutant of *B. thailandensis* E555 harbouring a kanamycin-resistance marked, in-frame  
98 deletion of its *wbil* gene (*B. thailandensis* E555 :: *wbil* (p-Knock KmR)) [31] was grown in 2 L of LB broth  
99 overnight at 37°C with shaking. The CPS was extracted *via* a modified hot-phenol method and purified as  
100 described previously [32].

101

102 For animal challenges, *B. pseudomallei* K96243 was inoculated from a glycerol stock into 100 mL L-broth  
103 and incubated for 24 h at 37°C with shaking. The optical density (OD<sub>590 nm</sub>) was adjusted to 0.4,  
104 corresponding to approximately  $4 \times 10^8$  CFU/mL, and diluted in L-broth to the correct concentration for  
105 challenge.

106

### 107 *Production of the GD3K6D3G pEAQ-HT t-HBcAg plasmid*

108 Building on work by Jegerlehner *et al.*, [33], who conjugated antigens to VLP to a single lysine inserted into  
109 the MIR sequence, a 14 amino acid peptide insert into the pEAQ-HT *t-HBcAg* plasmid was designed



145 containing fractions were combined and extensively dialyzed (5 x 1 L) against ammonium bicarbonate (20  
146 mM, pH 7.4) [35]. The fractions from the 75 % (w/v) and 75-25 % (w/v) interface of the sucrose gradient,  
147 containing most of the VLPs, were subjected to further purification on a Sephacryl S500 column over five  
148 runs. The first chromatography run was eluted into PBS and all subsequent runs were eluted into 20 mM  
149 ammonium bicarbonate buffer pH 7.4. Samples were analysed using transmission electron microscopy  
150 (TEM).

151

#### 152 *CPS conjugation to Tandem Core<sup>TM</sup> VLPs/Crm197*

153 CPS was oxidised and conjugated to carrier proteins by reductive amination as previously described [10].  
154 Briefly, purified CPS was dissolved in 1 x PBS buffer at 5 mg/mL concentration and sodium periodate  
155 (NaIO<sub>4</sub>) was added to give a final 28 mM concentration. The reaction mixture was vortexed until dissolution  
156 of NaIO<sub>4</sub> and then gently shaken for 3 h at room temperature. To remove the excess NaIO<sub>4</sub>, the reaction  
157 mixture was dialysed against MilliQ water in a dialysis tube with a molecular weight cut-off of 6-8 kDa and  
158 lyophilised. Oxidised CPS and the chosen carrier protein were dissolved in 1 x PBS buffer to give a final  
159 concentration ranging from 0.2 to 6 mg/mL. Then, 10 µL of 1 M NaCNBH<sub>3</sub> solution in 10 mM NaOH was  
160 added for each mL of the reaction mixture, which was gently shaken at room temperature for 10 days.  
161 Afterwards, the reaction mixture was quenched by adding 10 µL of 1 M NaBH<sub>4</sub> solution in 10 mM NaOH  
162 for each mL of the reaction mixture with shaking at room temperature for 3 h. The reaction mixture was  
163 dialysed against Milli-Q water in a dialysis tube with a molecular weight cut-off of 6-8 kDa and lyophilised.

164

#### 165 *Analysis of conjugate vaccines - SDS PAGE and agarose gel analysis*

166 SDS PAGE: loading buffer (10 µL) [Laemmli sample buffer (BIO-RAD): 25 % (v/v) glycerol; 62.5 mM  
167 Tris/HCl, pH 6.8; 2% (w/v) SDS; 5% (v/v) β-mercaptoethanol; 0.01 % (w/v) bromophenol] was added to  
168 protein (10 µL) in Milli-Q water. After heating at 100°C for 5 min, the samples were loaded onto a RunBlue  
169 precast gel (Expedeon) and run in RunBlue running buffer (Expedeon) [40 mM Tricine; 60 mM Tris/HCl;  
170 0.1 % (w/v) SDS; 2.5 mM sodium bisulfite; pH 8.2] at 180 V for 53 minutes. Gels were removed from the  
171 case and stained for protein with Instant Blue (Expedeon).

172

173 Agarose gel: 1.2 % (w/v) agarose solution in TBE buffer [100 mM Tris-HCl; 90 mM boric acid; 10 mM  
174 EDTA] was poured into gel mould and left to set at 4 °C. Samples (20 µL) were loaded in DNA loading  
175 buffer (5 µL; New England Biolabs) and gels were run at 60 V for 120 mins.

176

177

178

179 *Negative stain TEM*

180 Samples were diluted to approximately 0.1 mg /mL in 20 mM Tris HCl pH 8.0. A droplet (10 – 20  $\mu$ L) of  
181 each sample was placed on a strip of Parafilm. Glow discharged formvar – carbon coated copper grids,  
182 300 - 400 mesh (Agar Scientific) were place carbon side down on each sample. After 2 - 5 minutes  
183 adsorption, the grids were transferred to a droplet of 20 mM Tris HCl pH 8.0. The grids were then blotted  
184 and washed with 1 % (w/v) uranyl acetate in dH<sub>2</sub>O prior to staining with a droplet of 1 % (w/v) uranyl  
185 acetate for 10 seconds followed by blotting and air drying for at least 20 minutes. The dried grids were  
186 viewed in a transmission electron microscope.

187

188 *Immunogold labelling for TEM*

189 Samples were diluted and adsorbed to glow discharged, formvar – carbon nickel coated grids as described  
190 above. After adsorption and washing in 20 mM Tris HCl pH 8.0, the grids were placed on droplets of  
191 blocking buffer (0.5 % cold water fish skin gelatin, 0.025 % Tween-20 in 20 mM TBS pH 8.0) and  
192 incubated for 45 – 60 minutes. CPS Primary antibody (DstI) was diluted 1 in 50 in antibody diluent (0.05 %  
193 cold water fish skin gelatin in TBS pH 8.0). After blocking, the grids were incubated on droplets of diluted  
194 primary antibody for 60 minutes followed by washing by inversion over 3 successive droplets of antibody  
195 diluent. The washed grids were then incubated for 60 minutes on droplets of secondary antibody (gold  
196 conjugated anti-mouse diluted 1:25 in antibody diluent). Labelled grids were washed over 5 successive  
197 droplets of antibody diluent followed by a wash with 20 mM Tris HCl pH 8.0 and then stained with uranyl  
198 acetate as described above. As negative controls, samples were incubated with antibody diluent only in  
199 place of primary antibody and then processed as described for the other grids.

200

201 *Analysis of conjugate vaccines – protein and carbohydrate determination*

202 Quantification of total heptose was carried out by phenol-sulphuric acid assay [36]. Total protein  
203 quantification was carried out by Pierce™ BCA assay [37].

204

205 *Conjugate vaccines (Antigen amounts and polysaccharide: protein ratios)*

206 Due to inefficiencies of the reductive amination reaction, the amounts of CPS, Crm197 and VLP varied  
207 between vaccines but within each study the vaccine was standardised to CPS dose. The initial study at  
208 103 and 240 x MLD utilised a CPS concentration of 10  $\mu$ g per dose which was reduced in the later study to  
209 4  $\mu$ g per dose in order to discriminate between the vaccines (Table 1A and B). The vaccines contained 15  
210 % (w/v) Alum per dose.

211

212

213 A

| Challenge dose (MLD) | Antigen concentration per dose ( $\mu\text{g}$ ) |        |      |
|----------------------|--------------------------------------------------|--------|------|
|                      | CPS                                              | Crn197 | VLP  |
| 103 (IP)             | 10                                               | 2.2    | 3.4  |
| 240 (IP)             | 10                                               | 2.2    | 3.4  |
| 489 (IP)             | 4                                                | 1.9    | 0.51 |

214

215 B

| Challenge dose (MLD) | Ratio of polysaccharide to protein |               |
|----------------------|------------------------------------|---------------|
|                      | Crn197 conjugate                   | VLP conjugate |
| 103                  | 4.6 : 1                            | 2.9 : 1       |
| 240                  | 4.6 : 1                            | 2.9 : 1       |
| 489                  | 2.1 : 1                            | 7.8 : 1       |

216

217 **Table 1: (A) Antigen concentration ( $\mu\text{g}$ ) per dose of each conjugate vaccine. (B) Ratio of**  
218 **polysaccharide to protein per dose of each conjugate vaccine.**

219

### 220 *Animal challenge*

221 Groups of BALB/c female mice between 6 and 8 weeks old (Charles River UK) were acclimatised for two  
222 weeks prior to experimental start and vaccinated *via* the intra-muscular (IM) route on Day 0. Groups of  
223 control mice were given adjuvant only.

224 Vaccine boosts were given on days 14 and 28 and the mice were challenged *via* the intra-peritoneal route  
225 (IP) with 0.1 mL of *B. pseudomallei* K96243 at  $7.66 \times 10^4$ ,  $1.79 \times 10^5$  or  $3.64 \times 10^5$  CFU per mouse (103,  
226 240, and 489 x MLD respectively). We have previously calculated the MLD in the BALB/c mouse model to  
227 be 744 colony forming units (CFU) by the IP route [10]. The mice were observed twice daily for a period of  
228 35 days after challenge for signs of disease and culled at pre-determined humane end-points. All mice  
229 were tail-bled 2 weeks post-vaccination. All animal work was carried out according to the Animal (Scientific  
230 Procedures) Act 1986 and following challenge, the mice were handled within a containment level 3 half-  
231 suit isolator.

232

### 233 *Antibody analysis of animal sera*

234 ELISAs were performed on sera collected 14 days after the third vaccination. 96-well plates were coated  
235 with purified CPS at 10  $\mu\text{g}/\text{mL}$  in PBS (Dulbecco's PBS 1x, -CaCl<sub>2</sub>, -MgCl<sub>2</sub>) and incubated overnight at  
236 4°C. Each well was washed three times with PBS supplemented with 0.05 % (v/v) Tween-20 (Sigma). The  
237 wells were then blocked with 2 % (w/v) skimmed milk powder (Sigma) in PBS and incubated at 37°C for 1  
238 hour. Following three further washes with PBS-Tween, two-fold dilutions of the mouse serum samples in  
239 PBS supplemented with 2 % (w/v) skimmed milk powder were made across the plate. Also included into  
240 separate wells was serum from Adjuvant vaccinated mice as negative controls. The plate was incubated  
241 for a further 1 hour at 37°C and washed three times in PBS-Tween. A 1:2000 dilution of isotype specific  
242 goat anti-mouse horseradish peroxidase conjugate (Biorad) in PBS supplemented with 2 % (w/v) milk

243 powder was added to each well and the plate incubated at 37°C for 1 hour. Following six washes in PBS-  
244 Tween, 100 µL of Tetramethylbenzidine (KPL) substrate was added to each well according to the  
245 manufacturer's instructions, and incubated at room temperature for 20 minutes prior to measuring the  
246 absorbance at 620 nm. A reading above the mean negative control (adjuvant only sera) plus three standard  
247 deviations was considered positive and the titre was determined to be the reciprocal of the final positive  
248 dilution.

249

#### 250 *Enumeration of bacterial loads*

251 Mice surviving to day 35 post-challenge were humanely culled and the spleens, livers and lungs removed  
252 aseptically into 2 mL PBS. The organs were homogenised into 900 µL PBS using a sterile 40 µm  
253 disposable cell sieve and the barrel of a sterile syringe. A dilution series ( $10^{-1}$  to  $10^{-7}$ ) was prepared in 24  
254 well-tissue culture plates (900 µL PBS per well with the addition of 100 µL of sample) and 250 µL from  
255 each dilution (neat to  $10^{-6}$ ) were plated onto LB agar. Plates were incubated for 48 h at 37°C and the  
256 number of bacterial CFU was determined.

257

#### 258 *Statistical analysis*

259 For each animal experiment, appropriate group sizes were determined by a power analysis (allowing for  
260 sufficient power to elucidate an approximately 4-fold increase in hazard rate) and survival data was  
261 analysed by pairwise Log-Rank (Mantel-Cox) test [38] using the software GraphPad Prism (version 6.02).  
262 ELISA data was transformed to the logarithm of 10 and first analysed for differences in variance by the  
263 Brown-Forsythe test. Due to differences in variance, the ELISA data was analysed by the Kruskal-Wallis  
264 test and Dunn's multiple comparisons.

265

## 266 **Results**

267

### 268 **VLP production**

269 Our efforts focussed on expression of the GD3K6D3G TCVLPs in *Nicotiana benthamiana*, using the  
270 pEAQ-*HT* expression system developed in Lomonossoff group [39, 40]. The tandem core pEAQ-*HT*-*t*-  
271 HBcAg-EL expression plasmid [30] was subjected to restriction digestion and subsequent re-ligation with  
272 primers coding the requisite sequence. Transformation of *Agrobacterium tumefaciens* by electroporation  
273 with the resulting pEAQ-*HT*-*t*-HBcAg GD3K6D3G plasmid was followed by agro-infiltration of *Nicotiana*  
274 *benthamiana* leaves with bacterial suspensions. Six days post infiltration (dpi), the leaves were harvested.  
275 After an extensive clean-up, VLPs were purified by gel filtration chromatography (Sephacryl S500) (Figure  
276 1a). An estimation of the expression levels, based on comparison with standards, was made and shown to



277 be in the region of 0.4 mg of protein per gram of plant tissue (ca 0.7 mg per plant). The samples were  
278 subjected to transmission electron microscopy (TEM) analysis, which showed high quality VLPs, correctly  
279 assembled with a homogeneous size of approximately 30 nm diameter and the characteristic HBc particle  
280 shape with small spikes on the surface (Figure 1b).

281

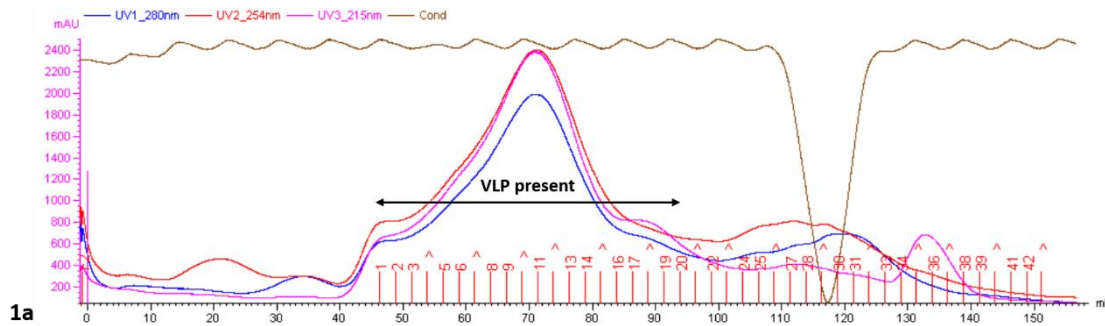

282

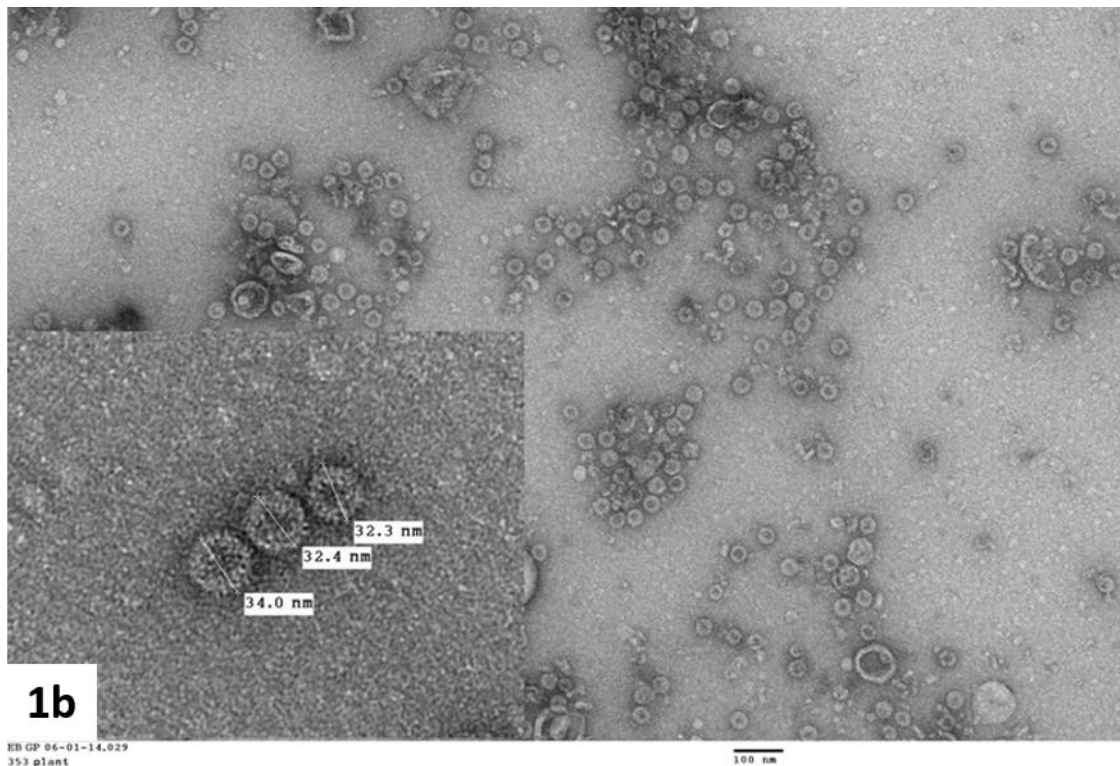

283

284 **Figure 1: a) Chromatogram of Gel filtration elution for GD3K6D3G TCVLPS on Sephacryl S500**  
285 **(VLP's presence from fraction 1 to 20 was confirmed by TEM); b) TEM image of plant GD3K6D3G**  
286 **TCVLPS. Specimens were negatively stained with 2% (w/v) uranyl acetate; the scale bar in the large**  
287 **image indicates 100 nm.**

288

### 289 **Glycoconjugate synthesis**

290 To construct the glycoconjugates, extracted CPS from *B. thailandensis* strain E555 [32] was activated with  
291 sodium periodate and covalently linked to Crm197 or GD3K6D3G TCVLPS *via* reductive amination.  
292 Conjugation was confirmed by SDS PAGE and agarose gel with Coomassie staining (Figure 2A and 2B,  
293 respectively), which confirms the shift in molecular weight from unconjugated carrier protein to conjugate;

294 and immunogold staining TEM (Figure 3A and 3B), which confirmed presence of CPS immunogenic  
295 epitope integrity through binding of an anti-CPS monoclonal.  
296

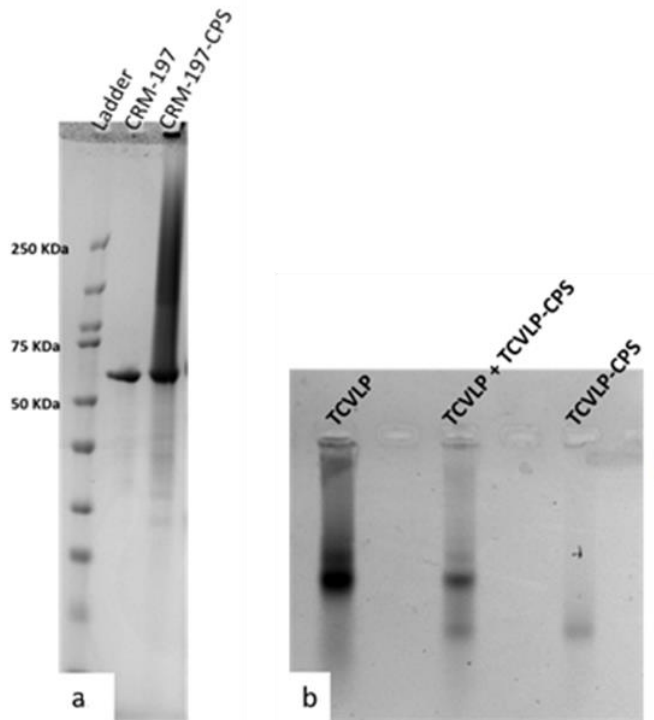

297

298

299 **Figure 2: Gel electrophoresis of CPS conjugates. (a) Crm197-CPS SDS PAGE, Coomassie blue**  
300 **staining; L: ladder; lane 1: Crm197 (58.4 KDa); lane 2: Crm197-CPS. (b): Plant TCVLP-CPS**  
301 **agarose gel (1.2% (w/v) in TBE), Coomassie blue staining. Lane 1: Plant TCVLP; lane 2: TCVLP+**  
302 **TCVLP-CPS; lane 3: TCVLP-CPS.**

303

304

305

306

307

308

309

310

311

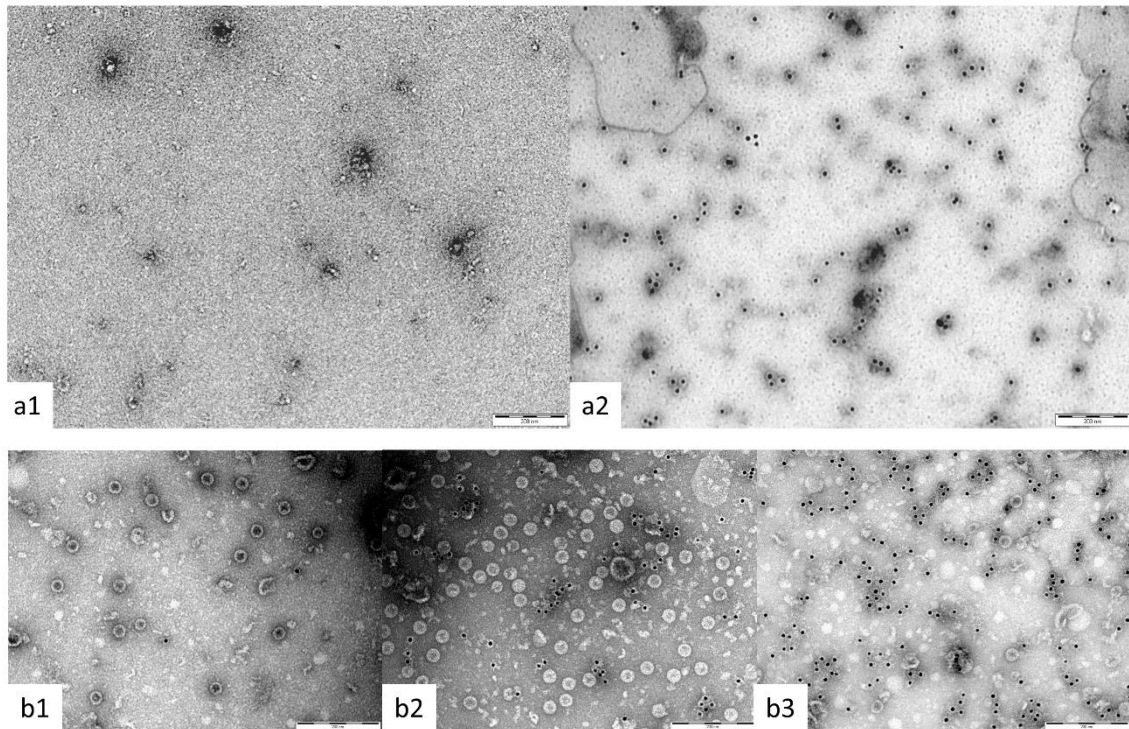

**Figure 3: Immunogold staining TEM of CPS conjugates. A: Crm197-CPS immunogold staining TEM. (a1) Crm197 unconjugated control; (a2) anti-CPS mAb. B: TCVLP-CPS immunogold staining TEM. (b1) TCVLP unconjugated control; (b2) anti-VLP core mAb (10e11); (b3) anti-CPS mAb. Specimens were negatively stained with 2 % uranyl acetate; the scale bar indicates 200 nm.**

318

### 319 **Comparison of glycoconjugate efficacy**

320 The initial challenge study was designed to estimate vaccine efficacy and utilised two challenge doses of  
321  $7.66 \times 10^4$  CFU per mouse (103 x MLD) and  $1.79 \times 10^5$  CFU per mouse (240 x MLD) of *B. pseudomallei*  
322 K96243 selected on the basis of previous work with CPS conjugates [10]. At 103 x MLD *B. pseudomallei*  
323 challenge there was no significant difference in protection between TCVLP-CPS vaccinated mice and  
324 those that received Crm197-CPS (Figure 4, A:  $p = 0.1385$ ). Both conjugate vaccines gave significantly  
325 greater protection than CPS alone (TCVLP-CPS:  $p = 0.0005$  and Crm197-CPS:  $p = 0.0117$ ) but the  
326 majority of surviving mice were not clear of infection (Figure 4, D). The survival of mice vaccinated with  
327 CPS was not significantly greater than mice that received adjuvant alone (Figure 4A:  $p = 0.6261$ ). With a  
328 240 x MLD *B. pseudomallei* challenge there was no significant difference in protective efficacy between  
329 the TCVLP-CPS and Crm197-CPS vaccines ( $p = 0.0982$ ) but no survivors were clear of infection (Figure 4,  
330 B and D). In this instance, survival of mice vaccinated with CPS was not significantly different to mice that  
331 received TCVLP-CPS or Crm197-CPS ( $p = 0.0763$  and  $p = 0.9394$  respectively). In order to discriminate  
332 between the conjugate vaccines, the challenge dose was increased to  $3.64 \times 10^5$  CFU per mouse in the  
333 next study (489 x MLD). At this challenge dose, efficacy of the Crm197-CPS vaccine was significantly  
334 greater than TCVLP-CPS (Figure 4, C:  $p = 0.0185$ ). In this instance, conjugate vaccine efficacy was  
335 significantly greater than CPS alone (TCVLP-CPS:  $p = 0.0049$ , Crm197-CPS:  $p < 0.0001$ ) but no survivors

336 were clear of infection (Figure 4, C and D). The survival data of the conjugate vaccines, CPS and adjuvant  
 337 (Alum) from each challenge dose was collated into single survival curves for each antigen (figure not  
 338 shown). There was no significant difference in efficacy between TCVLP-CPS immunised mice and  
 339 Crm197-CPS immunised mice ( $p = 0.5458$ ). Each conjugate was also significantly more efficacious than  
 340 CPS alone (TCVLP-CPS:  $p < 0.0001$ , Crm197-CPS:  $p < 0.0001$ ). In all mice that survived to study end,  
 341 one mouse was clear of bacterial burden in the liver, lung and spleen and had received the Crm197  
 342 conjugate.  
 343

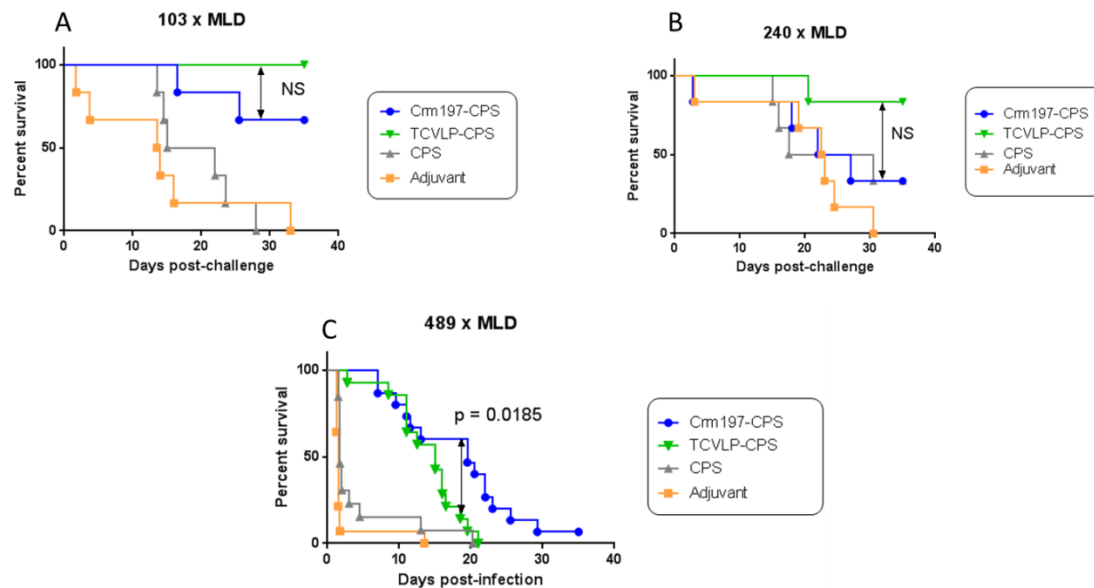

344

345 D

| Challenge dose | Clearance in survivors per vaccine group |           |       |          |
|----------------|------------------------------------------|-----------|-------|----------|
|                | Crm197-CPS                               | TCVLP-CPS | CPS   | Adjuvant |
| 103 x MLD      | 1 / 4                                    | 0 / 6     | 0 / 0 | 0 / 0    |
| 240 x MLD      | 0 / 2                                    | 0 / 5     | 0 / 2 | 0 / 0    |
| 489 x MLD      | 0 / 1                                    | 0 / 0     | 0 / 0 | 0 / 0    |

346

347 **Figure 4: Efficacy comparison of vaccine antigens to 103, 240 and 489 x MLD *B. pseudomallei***  
 348 **K96243 challenge.** Mice were immunised with CPS, Crm197-CPS, TCVLP-CPS, all formulated with Alum,  
 349 or adjuvant (Alum), via the i.m. route on days 0, 14 and 28. Five weeks after the final immunisation, mice  
 350 were challenged i.p. with 103 (A), 240 (B) or 489 (C) x MLD of *B. pseudomallei* strain K96243. Significance  
 351 was determined by the log-rank (Mantel-Cox) test. 103 and 240 x MLD challenge:  $n = 6$  mice per group.  
 352 489 x MLD challenge:  $n = 15$  mice per group. (D) Bacterial clearance from the liver, lung and spleen in  
 353 survivors per vaccine group between challenge doses. Individual tissues were mashed through a 0.45µm  
 354 sieve filter and the resultant filtrate plated for bacterial counts.

355

### 356 Comparison of glycoconjugate immunogenicity

357 ELISA analysis of serum obtained from tail bleeds after the third vaccination in each challenge study  
 358 showed a CPS-specific IgM response from CPS-vaccinated mice and isotype switching to IgG in mice that  
 359 received the conjugate vaccines. In all three challenge studies, mice vaccinated with Crm197-CPS had  
 360 significantly greater CPS-specific IgM and IgG titres compared to mice vaccinated with TCVLP-CPS  
 361 (Figure 5: 103 and 240 x MLD: IgM  $p \leq 0.001$ , IgG  $p \leq 0.0001$ . 489 x MLD: IgM and IgG  $p \leq 0.05$ ). For

362 information, the individually-reported CPS-specific IgG and IgM responses generated in mice that received  
363 10µg of CPS per dose were averaged by cage (n=6) for comparison to the cage-mean reported values for  
364 mice that received 4 µg/dose (Figure 5, black circles on 489 x MLD graph). Interestingly, the IgG  
365 responses from the Crm197 vaccinated mice were similar despite the difference in CPS amount, which  
366 may be due to the fact that the protein-polysaccharide ratio was similar between the two vaccines. In the  
367 TCVLP-CPS vaccinated groups, IgG responses were lower in mice that received the higher CPS  
368 concentration but this may be due to a lower polysaccharide-protein ratio in that vaccine.

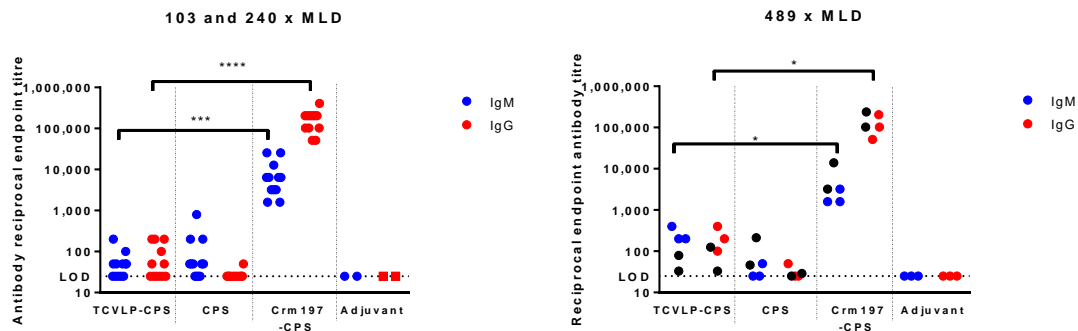

369

370 **Figure 5: ELISA analysis of the CPS specific IgG and IgM antibody response from mouse sera**  
371 **obtained from the 103, 240 and 489 x MLD challenge studies.** Mice were immunised on days 0, 14 and  
372 28 via the i.m. route. Sera were obtained from mice 14 days after the final boost, and titres of IgG and IgM  
373 specific for CPS were determined by ELISA. 103 and 240 x MLD: individual symbols represent a single  
374 immunised mouse with exception of the adjuvant controls (n=6). 489 x MLD: individual symbols represent  
375 a cage of 5 mice. The data from the 103 and 240 x MLD graph is shown on the 489 x MLD graph for  
376 information (black circles) to demonstrate the similarity in CPS titres generated in mice that received 10 µg  
377 or 4µg CPS. Statistical significance was determined by Kruskal-Wallis test and Dunn's multiple  
378 comparisons \*p ≤ 0.05, \*\*\*p ≤ 0.001, \*\*\*\*p ≤ 0.0001.

379

## 380 Discussion

381

382 Glycoconjugate vaccines have been instrumental in reducing disease incidence from several encapsulated  
383 bacteria including *N. meningitidis*, *S. pneumoniae* and *H. influenzae* type b, which use Crm197 as the  
384 carrier protein [16]. Despite the recent success of a Crm197 glycoconjugate protecting mice against  
385 *B. pseudomallei* challenge (14), there are concerns that exposure to multiple vaccines with the same  
386 carrier protein will result in immune interference leading to a possible reduction in vaccine efficacy (9, 15,  
387 16, 17, 18). The aim of this work was to explore an alternative vaccine platform to Crm197 for conjugation  
388 to CPS with assessment of immunogenicity and protective efficacy in a murine model of melioidosis. Whilst  
389 Crm197 is an established carrier protein, VLPs have primarily been used as antigens to vaccinate against  
390 the virus they are derived from [41]. VLPs have been used experimentally as carrier proteins for antigens  
391 of viral or parasitic pathogens but their use for the treatment of bacterial infections is not well established  
392 [19, 20, 42]. Tandem Core™ is a genetically modified hepatitis B core protein which enables insertion of  
393 constructs into the major immunodominant region (MIR) of the core whilst remaining assembly competent  
394 [30]. In this study, genetic insertion of a construct containing six lysine residues flanked on either side by

395 three aspartic acid residues into the MIR of core 2 allows for conjugation to *Burkholderia* CPS. The  
396 TCVLPs were produced from plants as plants have all the eukaryotic machinery for the correct post-  
397 translational modification and folding of the TCVLPs. Production in plants compared to other platforms  
398 (baculovirus, yeast and *E. coli*) is also advantageous in terms of cost, scalability and the low-risk of  
399 introducing human-relevant infectious agents, together with a high yield of production thanks to the  
400 transient expression technique [43]. To the author's knowledge, this is the first documented use of a virus-  
401 like particle in melioidosis vaccine development.

402

403 The first animal study was performed in order to estimate vaccine efficacy. The protective efficacy of both  
404 TCVLP-CPS, and Crm197-CPS were assessed against two *B. pseudomallei* challenge doses of  $7.66 \times 10^4$   
405 and  $1.79 \times 10^5$  CFU per mouse (103 and 240 x MLD respectively). In previous work, the MLD of  
406 *B. pseudomallei* K96243 infection in BALB/c mice by the intraperitoneal route was calculated to be 744  
407 CFU [10]. At both challenge doses the absolute level of survival was greatest in mice that received the  
408 TCVLP-CPS vaccine although statistical significance over Crm197-CPS was not achieved. In order to  
409 discriminate between the vaccines, the challenge dose on the following study was increased to  $3.64 \times 10^5$   
410 CFU per mouse (489 x MLD) and vaccine CPS content reduced from 10 to 4 µg/mouse. Under these  
411 conditions, efficacy of the Crm197 conjugate was significantly better than TCVLP-CPS. The difference in  
412 observed efficacy between these two conjugates could be due to potential differences in carrier  
413 immunogenicity or presentation of CPS to the immune system. Alternatively, as the vaccine doses were  
414 standardised on the basis of polysaccharide content, the amount of carrier protein was different between  
415 the two conjugates. This resulted in a different protein:polysaccharide ratio which is reported to affect  
416 vaccine immunogenicity in other conjugate vaccines (44).

417

418 The majority of mice surviving up to day 35 on all studies, with all vaccines, displayed continued  
419 bodyweight loss and clinical signs. At study end it is possible that these mice had entered the chronic  
420 phase of melioidosis and would have eventually succumbed to infection. It could be argued that these  
421 vaccine candidates had essentially extended the mean time to death as sterilising immunity was not  
422 achieved in all animals. While this may be true, the high challenge doses used across these studies were  
423 chosen to discriminate the protective efficacy between vaccine candidates only and are considered not  
424 realistic human exposures in natural scenarios. The pathology and clinical signs associated with the IP  
425 route of infection in these studies correlate well with those reported by Welkos *et al.*, [45]. The most  
426 common pathological finding included abscess formation in the spleen and splenomegaly.

427

428 ELISA analysis of mouse sera taken after the third vaccination showed the presence of CPS-specific IgM  
429 antibody titres in mice that received CPS, and CPS-specific IgM and IgG antibody titres in the groups that

430 received the conjugate vaccines. This finding was expected as the carrier protein stimulates development  
431 of T-cell dependent immunogenicity against the polysaccharide, which includes antibody isotype switching  
432 from IgM to IgG [46]. The significant difference in CPS-specific antibody titres generated between these  
433 vaccines may be attributable to differences in immunogenicity between the carrier proteins, the particulate  
434 nature of TCVLPs and different presentation of CPS to the immune system, or by variations in precise  
435 CPS loading between the conjugates. The significantly lower CPS-specific IgG antibody titres generated  
436 by a TCVLP-CPS conjugate suggests that titre is not indicative of vaccine efficacy at these challenge  
437 doses. This is unexpected as for nearly all licensed vaccines, prevention of infection correlates with the  
438 induction of specific antibodies. For three of the main bacterial pathogens that cause disease  
439 (*H. influenzae* type b, pneumococci, and meningococci), the correlates are presence of opsonophagocytic  
440 or bactericidal antibodies [47]. Furthermore, humoral immunity has been reported as an important  
441 mechanism of protection against *B. pseudomallei* infection [48]. One possible explanation is that low titres  
442 of CPS-specific antibodies are protective at lower challenge levels, which is feasible as it has been  
443 reported that correlates of protection are often relative to the challenge dose [49]. Alternatively, the  
444 TCVLP-CPS conjugate may generate low levels of high-affinity antibody which are protective at lower  
445 challenge levels; that the presentation of CPS to the immune system is different to Crm197-CPS; or that  
446 primary efficacy is *via* a different, perhaps cellular mediated, mechanism. This cellular mechanism in  
447 combination with a low level of antibody response may be superior at low challenge doses but at high  
448 doses bacterial numbers may overwhelm the humoral immune response, or deny the time needed for  
449 generation of a cellular response. Further investigation of potential cell-mediated effects from both  
450 conjugate vaccines warrants investigation.

451

452 The difference in protective efficacy seen between the Crm197-CPS conjugates used here and the ones  
453 used by Burtneck et al. [14] could be a result of several experimental differences. Firstly, the different  
454 animal models utilised by each lab. BALB/c mice used in this study are used primarily as an acute model  
455 of human melioidosis on the basis of proinflammatory cytokine release which correlates with disease  
456 severity [50, 51, 52, 53]. In contrast, C57BL/6 mice release lower levels of proinflammatory cytokines and  
457 therefore are used in the study of chronic melioidosis [51, 54, 55]. The challenge doses used in this study  
458 were also significantly greater, although disease progression from infection by the intraperitoneal route is  
459 less severe than inhalational challenge. Lastly, the use of alhydrogel and CpG by Burtneck et al. as  
460 opposed to alhydrogel alone as the adjuvant which was used in these studies could be beneficial given  
461 that CpG motifs have been shown to improve humoral and cellular immune responses [56].

462

463 The results from this study show that CPS conjugates utilising either Tandem Core™ or Crm197 as the  
464 carrier protein are effective vaccines for immunisation against melioidosis. The difference in generated IgG  
465 antibody titres between the conjugates warrants investigation.

466

#### 467 **Funding Statement**

468

469 This research was funded by the US Defence Threat Reduction Agency (DTRA), grant CBBA12-  
470 VAXBT2-1-0032. Studies at the JIC were supported by the UK BBSRC Institute Strategic Programme on  
471 Understanding and Exploiting Metabolism (MET) [BB/J004561/1] and the John Innes Foundation. The  
472 funders had no role in study design, data collection and analysis, decision to publish, or preparation of the  
473 manuscript. WMR is a NIHR Senior Investigator and is supported by the UCLH NIHR BRC.

474

#### 475 **Competing financial interests**

476 G.P.L. declares that he is a named inventor on granted patent WO 29087391 A1 which describes the  
477 transient expression system used in this manuscript.

478 M. W. and R. A. F. declare that they are named inventors on granted patent WO 2015124919 A1 which  
479 describes the development of vaccines based on hepatitis b core antigens.

480

#### 481 **References**

482 1. Wuthiekanun V, Smith MD, White NJ. Survival of *Burkholderia pseudomallei* in the absence of  
483 nutrients. Transactions of the Royal Society of Tropical Medicine and Hygiene. 1995;89(5):491.

484 2. Pumpuang A, Chantratita N, Wikraiphath C, Saiprom N, Day NP, Peacock SJ, et al. Survival of  
485 *Burkholderia pseudomallei* in distilled water for 16 years. Transactions of the Royal Society of Tropical  
486 Medicine and Hygiene. 2011;105(10):598-600.

487 3. Baker AL, Ezzahir J, Gardiner C, Shipton W, Warner JM. Environmental Attributes Influencing the  
488 Distribution of *Burkholderia pseudomallei* in Northern Australia. PloS one. 2015;10(9):e0138953.

489 4. Peacock SJ, Schweizer HP, Dance DA, Smith TL, Gee JE, Wuthiekanun V, et al. Management of  
490 accidental laboratory exposure to *Burkholderia pseudomallei* and *B. mallei*. Emerging infectious diseases.  
491 2008;14(7):e2.

492 5. Limmathurotsakul D, Golding N, Dance DA, Messina JP, Pigott DM, Moyes CL, et al. Predicted  
493 global distribution of *Burkholderia pseudomallei* and burden of melioidosis. Journal of immunology  
494 research. 2016;1(1).

495 6. Wikraiphath C, Charoensap J, Utaisinchaoen P, Wongratanacheewin S, Taweechaisupapong S,  
496 Woods DE, et al. Comparative in vivo and in vitro analyses of putative virulence factors of *Burkholderia*  
497 *pseudomallei* using lipopolysaccharide, capsule and flagellin mutants. FEMS immunology and medical  
498 microbiology. 2009;56(3):253-9.



- 499 7. Nelson M, Prior JL, Lever MS, Jones HE, Atkins TP, Titball RW. Evaluation of lipopolysaccharide  
500 and capsular polysaccharide as subunit vaccines against experimental melioidosis. *Journal of medical*  
501 *microbiology*. 2004;53(Pt 12):1177-82.
- 502 8. Avci FY, Li X, Tsuji M, Kasper DL. Isolation of carbohydrate-specific CD4(+) T cell clones from  
503 mice after stimulation by two model glycoconjugate vaccines. *Nature protocols*. 2012;7(12):2180-92.
- 504 9. Pichichero ME. Protein carriers of conjugate vaccines: characteristics, development, and clinical  
505 trials. *Human vaccines & immunotherapeutics*. 2013;9(12):2505-23.
- 506 10. Scott AE, Burtneck MN, Stokes MG, Whelan AO, Williamson ED, Atkins TP, et al. *Burkholderia*  
507 *pseudomallei* capsular polysaccharide conjugates provide protection against acute melioidosis. *Infection*  
508 *and immunity*. 2014;82(8):3206-13.
- 509 11. Scott AE, Christ WJ, George AJ, Stokes MG, Lohman GJ, Guo Y, et al. Protection against  
510 Experimental Melioidosis with a Synthetic manno-Heptopyranose Hexasaccharide Glycoconjugate.  
511 *Bioconjugate chemistry*. 2016;27(6):1435-46.
- 512 12. Giannini G, Rappuoli R, Ratti G. The amino-acid sequence of two non-toxic mutants of diphtheria  
513 toxin: CRM45 and CRM197. *Nucleic acids research*. 1984;12(10):4063-9.
- 514 13. Broker M, Costantino P, DeTora L, McIntosh ED, Rappuoli R. Biochemical and biological  
515 characteristics of cross-reacting material 197 CRM197, a non-toxic mutant of diphtheria toxin: use as a  
516 conjugation protein in vaccines and other potential clinical applications. *Biologicals : journal of the*  
517 *International Association of Biological Standardization*. 2011;39(4):195-204.
- 518 14. Burtneck MN, Shaffer TL, Ross BN, Muruato LA, Sbrana E, DeShazer D, et al. Development of  
519 Subunit Vaccines That Provide High-Level Protection and Sterilizing Immunity against Acute Inhalational  
520 Melioidosis. *Infection and immunity*. 2018;86(1).
- 521 15. Dagan R, Poolman J, Siegrist CA. Glycoconjugate vaccines and immune interference: A review.  
522 *Vaccine*. 2010;28(34):5513-23.
- 523 16. Knuf M, Kowalzik F, Kieninger D. Comparative effects of carrier proteins on vaccine-induced  
524 immune response. *Vaccine*. 2011;29(31):4881-90.
- 525 17. Tontini M, Berti F, Romano MR, Proietti D, Zambonelli C, Bottomley MJ, et al. Comparison of  
526 CRM197, diphtheria toxoid and tetanus toxoid as protein carriers for meningococcal glycoconjugate  
527 vaccines. *Vaccine*. 2013;31(42):4827-33.
- 528 18. Pobre K, Tashani M, Ridda I, Rashid H, Wong M, Booy R. Carrier priming or suppression:  
529 understanding carrier priming enhancement of anti-polysaccharide antibody response to conjugate  
530 vaccines. *Vaccine*. 2014;32(13):1423-30.
- 531 19. Grgacic EV, Anderson DA. Virus-like particles: passport to immune recognition. *Methods (San*  
532 *Diego, Calif)*. 2006;40(1):60-5.

- 533 20. Kushnir N, Streatfield SJ, Yusibov V. Virus-like particles as a highly efficient vaccine platform:  
534 diversity of targets and production systems and advances in clinical development. *Vaccine*. 2012;31(1):58-  
535 83.
- 536 21. Ludwig C, Wagner R. Virus-like particles-universal molecular toolboxes. *Current opinion in*  
537 *biotechnology*. 2007;18(6):537-45.
- 538 22. Zabel F, Kundig TM, Bachmann MF. Virus-induced humoral immunity: on how B cell responses  
539 are initiated. *Current opinion in virology*. 2013;3(3):357-62.
- 540 23. Dunachie SJ, Jenjaroen K, Reynolds CJ, Quigley KJ, Sergeant R, Sumonwiriya M, et al. Infection  
541 with *Burkholderia pseudomallei* - immune correlates of survival in acute melioidosis. *Scientific reports*.  
542 2017;7(1):12143.
- 543 24. Zhao Q, Li S, Yu H, Xia N, Modis Y. Virus-like particle-based human vaccines: quality  
544 assessment based on structural and functional properties. *Trends in biotechnology*. 2013;31(11):654-63.
- 545 25. Milich DR, McLachlan A. The nucleocapsid of hepatitis B virus is both a T-cell-independent and a  
546 T-cell-dependent antigen. *Science (New York, NY)*. 1986;234(4782):1398-401.
- 547 26. Cooper A, Tal G, Lider O, Shaul Y. Cytokine induction by the hepatitis B virus capsid in  
548 macrophages is facilitated by membrane heparan sulfate and involves TLR2. *Journal of immunology*  
549 (Baltimore, Md : 1950). 2005;175(5):3165-76.
- 550 27. Peyret H, L Stephen S, Stonehouse N, Rowlands D. History and Potential of Hepatitis B Virus  
551 Core as a VLP Vaccine Platform: CRC; 2015. 177-86 p.
- 552 28. Whitacre DC, Lee BO, Milich DR. Use of hepadnavirus core proteins as vaccine platforms. *Expert*  
553 *review of vaccines*. 2009;8(11):1565-73.
- 554 29. Yang M, Lai H, Sun H, Chen Q. Virus-like particles that display Zika virus envelope protein  
555 domain III induce potent neutralizing immune responses in mice. *Scientific reports*. 2017;7(1):7679.
- 556 30. Peyret H, Gehin A, Thuenemann EC, Blond D, El Turabi A, Beales L, et al. Tandem fusion of  
557 hepatitis B core antigen allows assembly of virus-like particles in bacteria and plants with enhanced  
558 capacity to accommodate foreign proteins. *PloS one*. 2015a;10(4):e0120751.
- 559 31. Champion OL, Gourlay LJ, Scott AE, Lassaux P, Conejero L, Perletti L, et al. Immunisation with  
560 proteins expressed during chronic murine melioidosis provides enhanced protection against disease.  
561 *Vaccine*. 2016;34(14):1665-71.
- 562 32. Bayliss M, Donaldson MI, Nepogodiev SA, Pergolizzi G, Scott AE, Harmer NJ, Field RA, Prior JL.  
563 Structural characterisation of the capsular polysaccharide expressed by *Burkholderia thailandensis* strain  
564 E555:: wbil (pKnock-KmR) and assessment of the significance of the 2-O-acetyl group in immune  
565 protection. *Carbohydr Res*. 2017;21(452):17-24

- 566 33. Jegerlehner A, Tissot A, Lechner F, Sebbel P, Erdmann I, Kundig T, et al. A molecular assembly  
567 system that renders antigens of choice highly repetitive for induction of protective B cell responses.  
568 *Vaccine*. 2002;20(25-26):3104-12.
- 569 34. Peyret H. Developing a novel hepatitis B core - based antigen presentation system. Doctoral  
570 thesis, University of East Anglia. 2014.
- 571 35. Peyret H. A protocol for the gentle purification of virus-like particles produced in plants. *Journal of*  
572 *virological methods*. 2015b;225:59-63.
- 573 36. Masuko T, Minami A, Iwasaki N, Majima T, Nishimura S, Lee YC. Carbohydrate analysis by a  
574 phenol-sulfuric acid method in microplate format. *Analytical biochemistry*. 2005;339(1):69-72.
- 575 37. Smith PK, Krohn RI, Hermanson GT, Mallia AK, Gartner FH, Provenzano MD, et al. Measurement  
576 of protein using bicinchoninic acid. *Analytical biochemistry*. 1985;150(1):76-85.
- 577 38. Mantel N. Evaluation of survival data and two new rank order statistics arising in its consideration.  
578 *Cancer chemotherapy reports*. 1966;50(3):163-70.
- 579 39. Sainsbury F, Thuenemann EC, Lomonosoff GP. pEAQ: versatile expression vectors for easy  
580 and quick transient expression of heterologous proteins in plants. *Plant biotechnology journal*.  
581 2009;7(7):682-93.
- 582 40. Peyret H, Lomonosoff GP. The pEAQ vector series: the easy and quick way to produce  
583 recombinant proteins in plants. *Plant molecular biology*. 2013;83(1-2):51-8.
- 584 41. Mohsen MO, Zha L, Cabral-Miranda G, Bachmann MF. Major findings and recent advances in  
585 virus-like particle (VLP)-based vaccines. *Seminars in immunology*. 2017.
- 586 42. Pumpens P, Grens E. HBV core particles as a carrier for B cell/T cell epitopes. *Intervirology*.  
587 2001;44(2-3):98-114.
- 588 43. Chen Q, Lai H. Plant-derived virus-like particles as vaccines. *Human vaccines &*  
589 *immunotherapeutics*. 2013;9(1):26-49.
- 590 44. Carmenate T, Canaán L, Álvarez A, Delgado M, González S, Menéndez T, Rodés L, Guillén G.  
591 Effect of conjugation methodology on the immunogenicity and protective efficacy of meningococcal group  
592 C polysaccharide – P64K protein conjugates. *FEMS Immunology & Medical Microbiology*. 2004;40(3):193–  
593 199.
- 594 45. Welkos SL, Klimko CP, Kern SJ, Bearss JJ, Bozue JA, Bernhards RC, et al. Characterization of  
595 *Burkholderia pseudomallei* Strains Using a Murine Intraperitoneal Infection Model and In Vitro Macrophage  
596 Assays. *PloS one*. 2015;10(4):e0124667.
- 597 46. Jones C. Vaccines based on the cell surface carbohydrates of pathogenic bacteria. *Anais da*  
598 *Academia Brasileira de Ciencias*. 2005;77(2):293-324.
- 599 47. Plotkin SA. Correlates of protection induced by vaccination. *Clinical and vaccine immunology :*  
600 *CVI*. 2010;17(7):1055-65.

- 601 48. Silva EB, Dow SW. Development of *Burkholderia mallei* and *pseudomallei* vaccines. *Frontiers in*  
602 *cellular and infection microbiology*. 2013;3:10.
- 603 49. Plotkin SA. Vaccines: correlates of vaccine-induced immunity. *Clinical infectious diseases* : an  
604 official publication of the Infectious Diseases Society of America. 2008;47(3):401-9.
- 605 50. Wiersinga WJ, van der Poll T. Immunity to *Burkholderia pseudomallei*. *Current opinion in*  
606 *infectious diseases*. 2009;22(2):102-8.
- 607 51. Lazar Adler NR, Govan B, Cullinane M, Harper M, Adler B, Boyce JD. The molecular and cellular  
608 basis of pathogenesis in melioidosis: how does *Burkholderia pseudomallei* cause disease? *FEMS*  
609 *microbiology reviews*. 2009;33(6):1079-99.
- 610 52. Judy BM, Taylor K, Deeraksa A, Johnston RK, Endsley JJ, Vijayakumar S, et al. Prophylactic  
611 application of CpG oligonucleotides augments the early host response and confers protection in acute  
612 melioidosis. *PloS one*. 2012;7(3):e34176.
- 613 53. Barnes KB, Steward J, Thwaite JE, Lever MS, Davies CH, Armstrong SJ, et al.  
614 Trimethoprim/sulfamethoxazole (co-trimoxazole) prophylaxis is effective against acute murine inhalational  
615 melioidosis and glanders. *International journal of antimicrobial agents*. 2013;41(6):552-7.
- 616 54. Tan GY, Liu Y, Sivalingam SP, Sim SH, Wang D, Paucod JC, et al. *Burkholderia pseudomallei*  
617 aerosol infection results in differential inflammatory responses in BALB/c and C57Bl/6 mice. *Journal of*  
618 *medical microbiology*. 2008;57(Pt 4):508-15.
- 619 55. Conejero L, Patel N, de Reynal M, Oberdorf S, Prior J, Felgner PL, et al. Low-dose exposure of  
620 C57BL/6 mice to *burkholderia pseudomallei* mimics chronic human melioidosis. *The American journal of*  
621 *pathology*. 2011;179(1):270-80.
- 622 56. Bode C, Zhao G, Steinhagen F, Kinjo T, Klinman DM. CpG DNA as a vaccine adjuvant. *Expert*  
623 *Rev Vaccines*. 2011;10(4):499–511.
- 624
- 625
- 626
- 627
- 628
- 629
- 630
- 631
- 632
- 633
- 634
- 635
- 636
